# Supplementary material for: Pd Nanoparticles Stabilized by Hypercrosslinked Polystyrene Catalyze Selective Triple C-C Bond Hydrogenation and Suzuki Cross-Coupling
Source: Hindawi journal article supplement (doi:10.1155/2019/6262176), 2019-01-13
Supplement: f1 [file 6262176.f1.doc]

**Supplementary Materials**

**Figure S1:** Normalized DRIFT spectra of initial MN270 and Pd/MN270-NaW (as-synthesized and reduced in H2 flow)

| 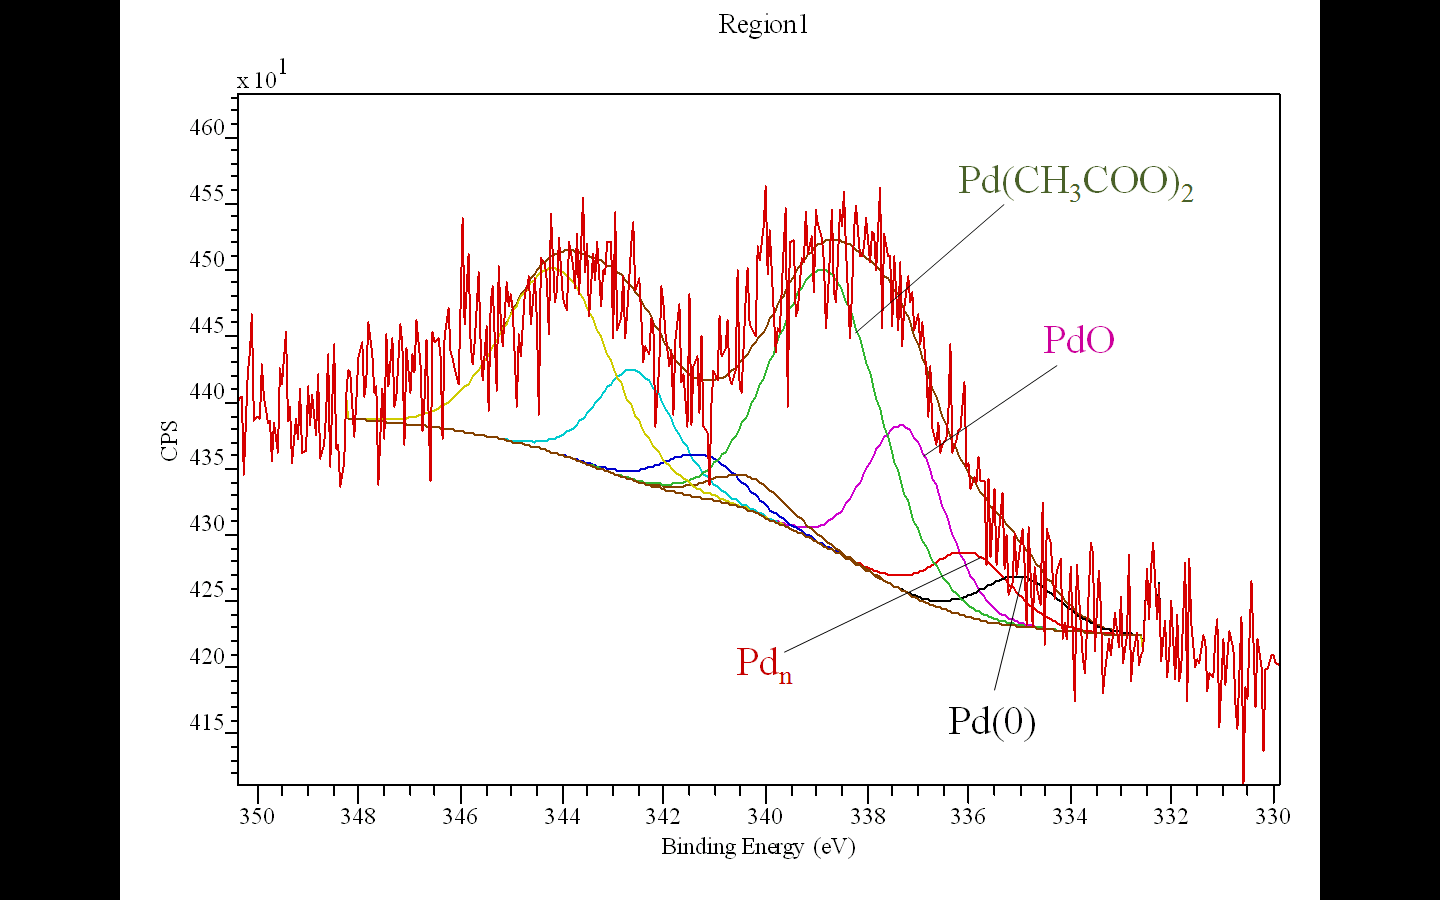  a) | 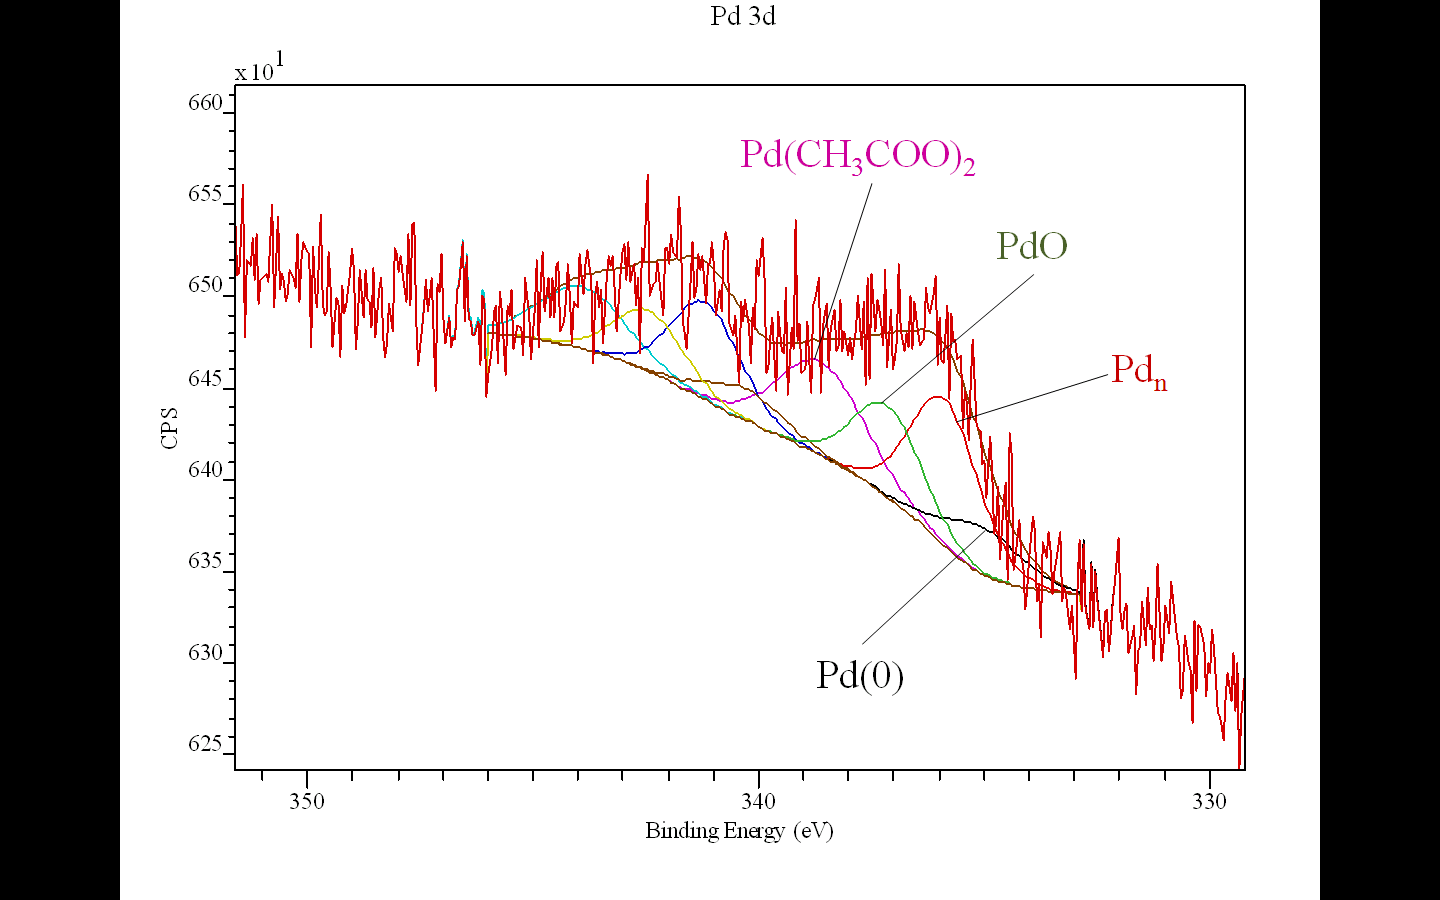  b) |
| --- | --- |
| 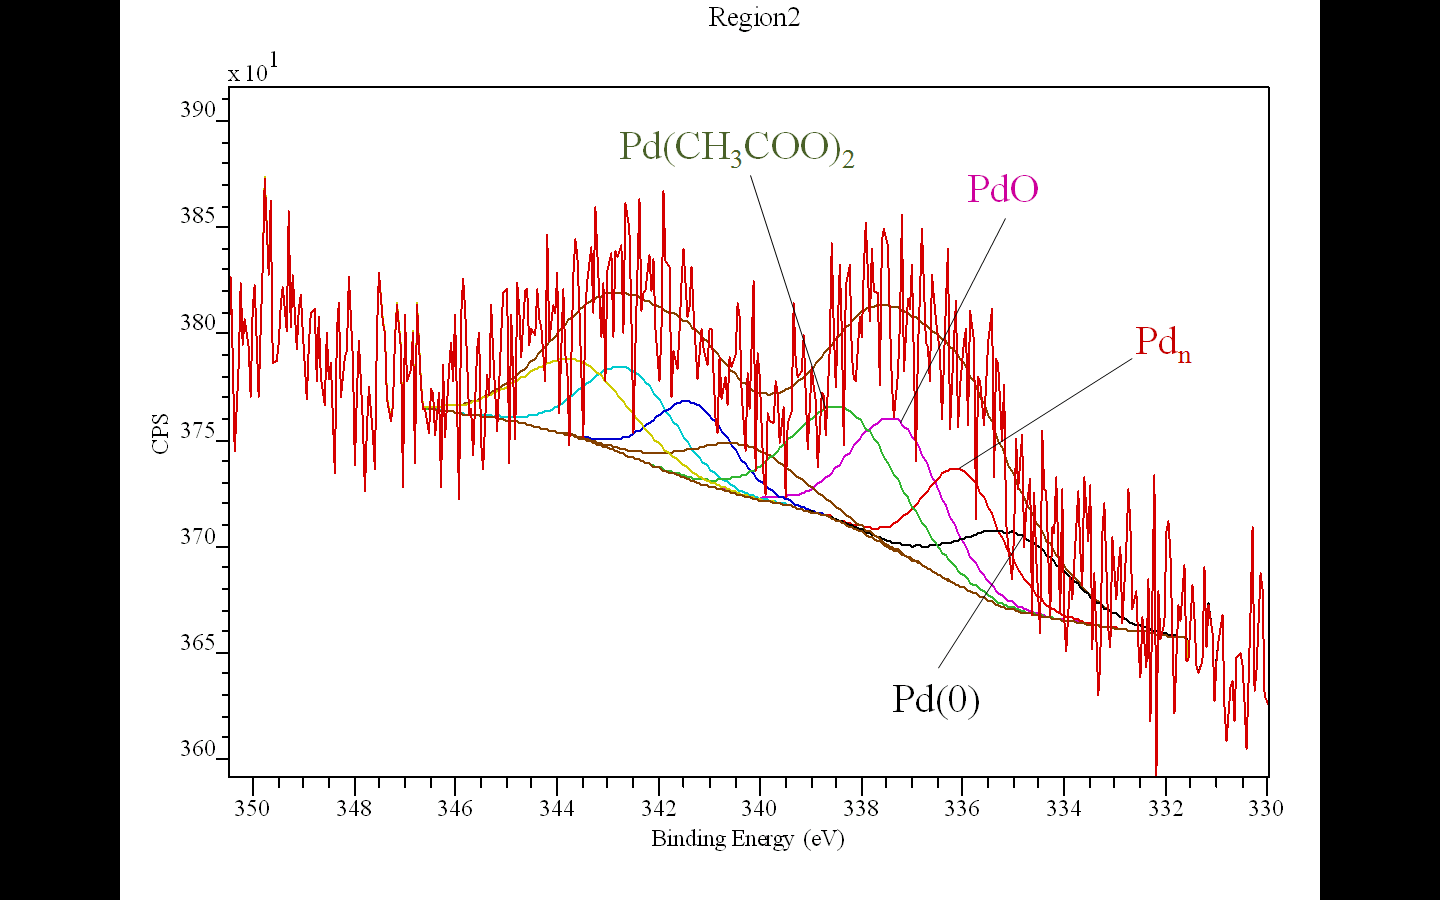  c) | 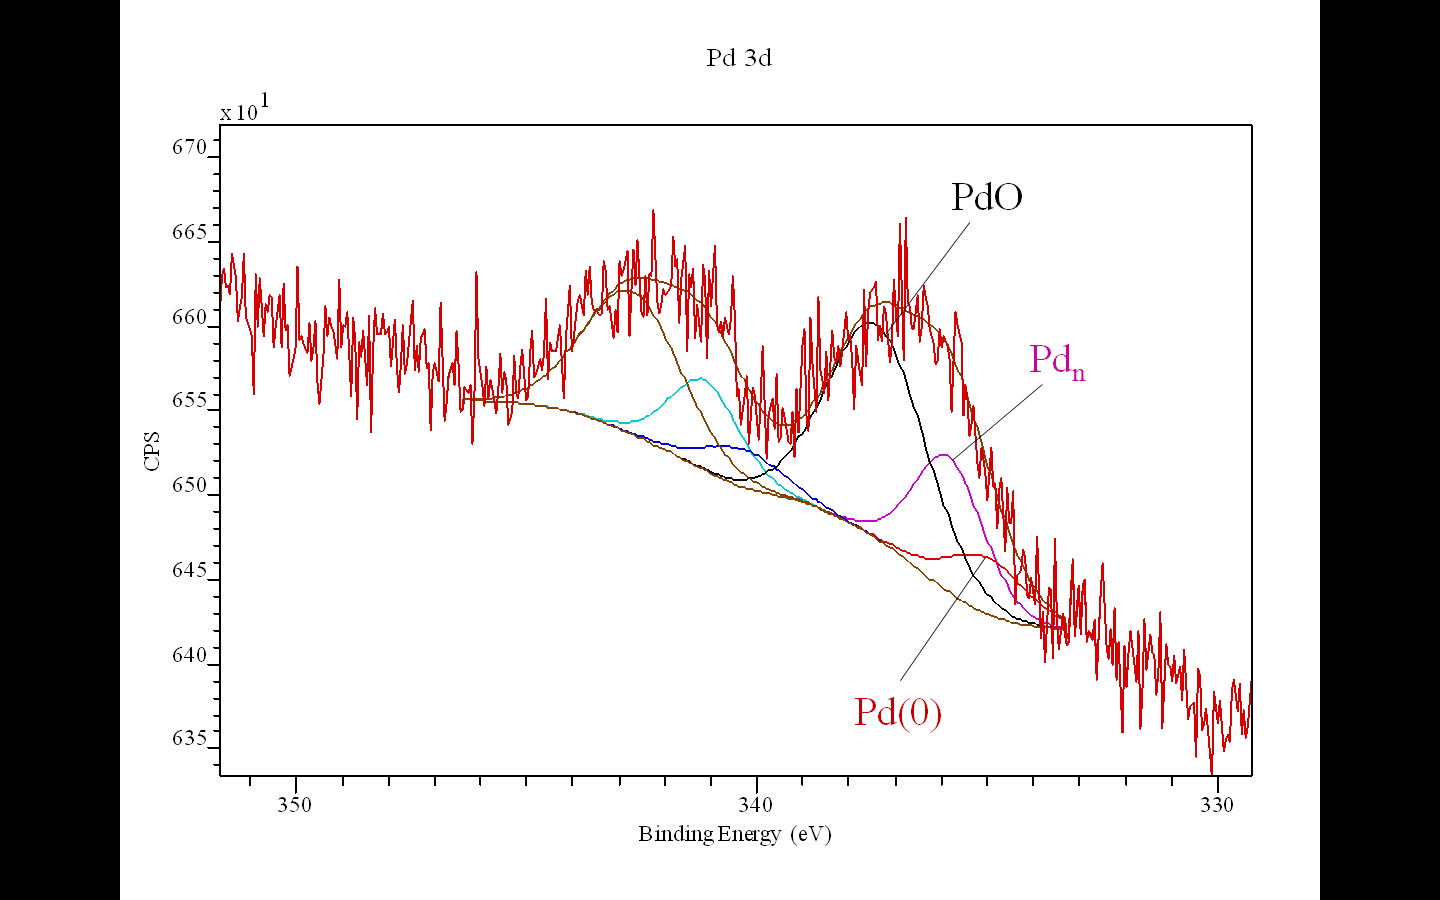  d) |

**Figure S2:** High resolution spectra of Pd 3d of freshly prepared Pd/MN270 (a) and Pd/MN270-NaW (b) and reduced in H2 flow Pd/MN270-H2 (c) and Pd/MN270-NaW-H2 (d)
